# Supplementary material for: LMO2 attenuates tumor growth by targeting the Wnt signaling pathway in breast and colorectal cancer
Source: PubMed Central journal article supplement (PMC5078767; doi:10.1038/srep36050), 2016-10-25

**LMO2 attenuates tumor growth by targeting the Wnt signaling pathway in breast and colorectal cancer**

Ye Liu<sup>1</sup>, Di Huang<sup>1</sup>, Zhaoyang Wang<sup>1</sup>, Chao Wu<sup>1</sup>, Zhao Zhang<sup>2</sup>, Dan Wang<sup>3</sup>, Zongjin Li<sup>4</sup>,  
Tianhui Zhu<sup>1</sup>, Shuang Yang<sup>1</sup>, Wei Sun<sup>1\*</sup>

<sup>1</sup>Laboratory of Molecular Genetics in School of Medicine, Nankai University, Tianjin, China

<sup>2</sup>Department of Anorectal, Tianjin Union Medical Center, Tianjin, China

<sup>3</sup>Department of Pathology, General Hospital of Tianjin Medical University, Tianjin, China

<sup>4</sup>Laboratory of Stem cells in School of Medicine, Nankai University, Tianjin, China

\*Corresponding author: Dr. Wei Sun at Laboratory of Molecular Genetics, School of Medicine, Nankai University, Tianjin, P.R. China.

Tel/Fax: 86-22-23504478.

Email address: [sunweibio@nankai.edu.cn](mailto:sunweibio@nankai.edu.cn).

## Supplementary Information

### 1. Supplementary methods

#### 1.1. RhoA activity detection assay

Assays were performed according to the instructions provided with the RhoA Activation Assay kit (Abcam, Cambridge, UK). Cells were cultured to approximately 8–90% confluence and stimulated with 200 ng/ml Wnt3A for 15 min before harvesting. Whole cell lysates were collected, aliquoted into tubes containing 1 mg of total cellular protein and adjusted to a volume of 1 ml with 1 × assay buffer. Then, 1 µl anti-active RhoA antibodies and 20 µl protein A/G agarose beads were added to each tube for the pulldown assays. After pulldown, western blotting was performed with anti-RhoA antibodies.

#### 2. Primer information

| Primer names  | Sequences 5'–3'                | Restriction site |
|---------------|--------------------------------|------------------|
| LMO2-forward  | AATGCGGGTGAAAGACAAAG           | –                |
| LMO2-reverse  | CCCCAAAGTGCCTAAGAGTG           | –                |
| GAPDH-forward | TGAAGGTCGGTGTGAACGGAT          | –                |
| GAPDH-reverse | CATGTAGGCCATGA GGTCCACCAC      | –                |
| Dvl1 F1       | GTCGAATTCGGATGGCGGAGACCAAATC   | <i>EcoRI</i>     |
| Dvl1 F2       | GTCGAATTCGGGACCTGCCCCACCCCTT   | <i>EcoRI</i>     |
| Dvl1 F3       | GTCGAATTCGGAGCCGGCTGAGCAGCTCC  | <i>EcoRI</i>     |
| Dvl1 R1       | GTCGGTACCTCACATGATGTCCACAAAGAA | <i>KpnI</i>      |
| Dvl1 R2       | GTCGGTACCTCAGCCAGGCACTGAGCTGGT | <i>KpnI</i>      |

|         |                                    |              |
|---------|------------------------------------|--------------|
| Dvl2 F1 | GTCGAATTCGGATGGCGGGTAGCAGCACTG     | <i>EcoRI</i> |
| Dvl2 F2 | GTCGAATTCGGCCTCCAGTCCATGAGCCTC     | <i>EcoRI</i> |
| Dvl2 F3 | GTCGAATTCGGTCATCCTTCAGCAGCGTCA     | <i>EcoRI</i> |
| Dvl2 R1 | GTCGGTACCCTACATAACATCCACAAAGAACTCG | <i>KpnI</i>  |
| Dvl2 R2 | GTCGGTACCCTAGCTCATGGAGGAGGAACCTG   | <i>KpnI</i>  |

**Wnt signaling pathway downstream genes (purchased from GeneCopoeia)**

| Genes     | product number |
|-----------|----------------|
| CD44      | HQP022972      |
| Cyclin D1 | HQP016204      |
| c-myc     | HQP011597      |

**3. Antibody information**

| Product name                  | Catalog number | Company | Application <sup>1</sup> |
|-------------------------------|----------------|---------|--------------------------|
| Anti-rabbit IgG               | 7074           | CST     | WB                       |
| Anti-mouse IgG                | 7076           | CST     | WB                       |
| Anti- $\alpha$ -Tubulin       | ab108629       | Abcam   | WB                       |
| Anti-Lamin A antibody         | ab26300        | Abcam   | WB                       |
| Anti- $\beta$ -actin Antibody | 21338          | SAB     | WB                       |
| Myc-Tag (9B11) Mouse mAb      | 2276           | CST     | WB                       |
| Anti-Disheveled 2 antibody    | ab22616        | Abcam   | WB                       |
| Anti-Disheveled 2 antibody    | 3216           | CST     | IP, IF                   |

|                                        |          |            |                        |
|----------------------------------------|----------|------------|------------------------|
| Anti-Disheveled/Dvl1 antibody          | ab170694 | Abcam      | WB, IP, IF             |
| Anti- $\beta$ -Catenin antibody        | ab32572  | Abcam      | WB                     |
| Anti- $\beta$ -Catenin antibody        | 8480     | CST        | IF, IHC                |
| Anti-Axin1 antibody                    | 2087     | CST        | IP                     |
| Anti-Ki-67 antibody                    | ZM-0166  | ZSGB-BIO   | IHC                    |
| Anti-LMO2 antibody[1A9-3B11]           | ab81988  | Abcam      | WB, IF, IHC            |
| Anti-LMO2 antibody-ChIP Grade          | ab72841  | Abcam      | IP                     |
| Alexa fluor 546 donkey anti-rabbit IgG | A10040   | Invitrogen | IF                     |
| Alexa fluor 568 donkey anti-mouse IgG  | A10037   | Invitrogen | IF                     |
| Alexa fluor 488 goat anti-rabbit IgG   | A11008   | Invitrogen | IF                     |
| RhoA Activation Assay kit              | Ab173237 | Abcam      | RhoA activation assays |

1. abbreviations: WB, Western blot; IP, Immunoprecipitation; IF, Immunofluorescence; IHC, Immunohistochemistry

## Supplementary Figures and Figure legends

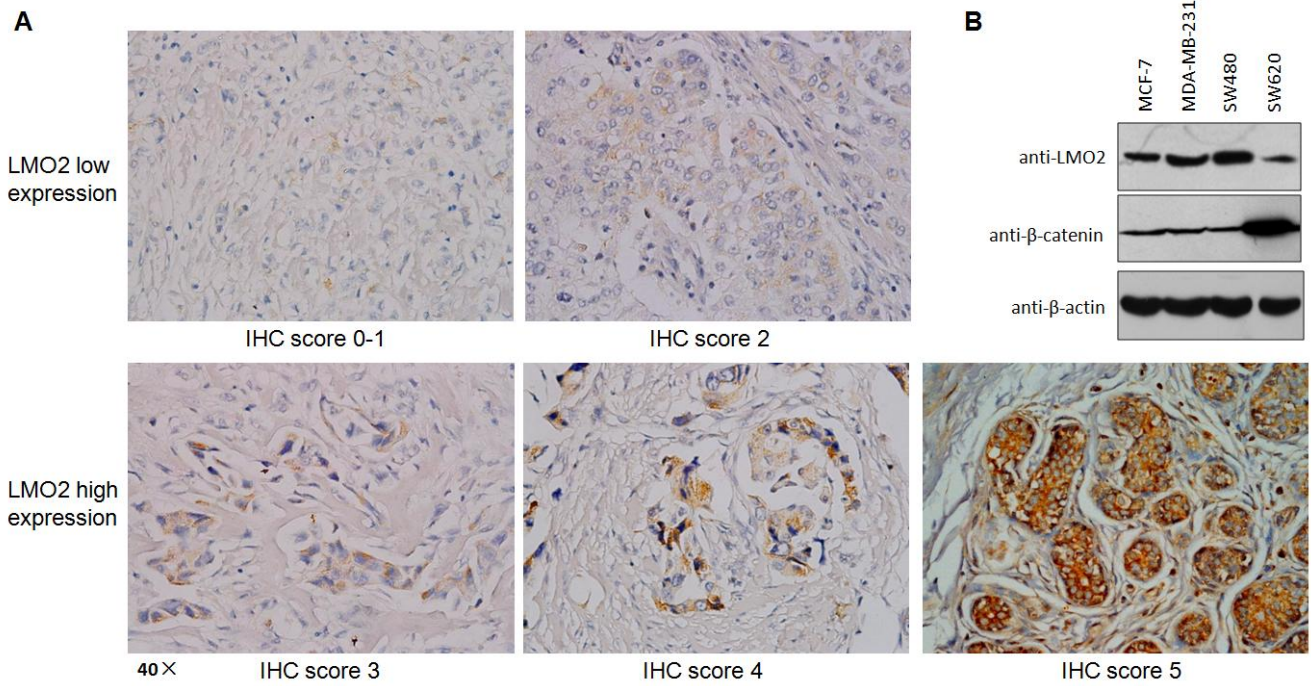

**Figure S1.** (A) Representative images of anti-LMO2 immunohistochemistry staining of breast tissue samples scored from 0-5. The colorectal tissue samples were also scored based on these criteria. (B) Western blotting images of LMO2 and  $\beta$ -catenin in breast cancer and colorectal cancer cell lines.  $\beta$ -actin was used as the loading control.

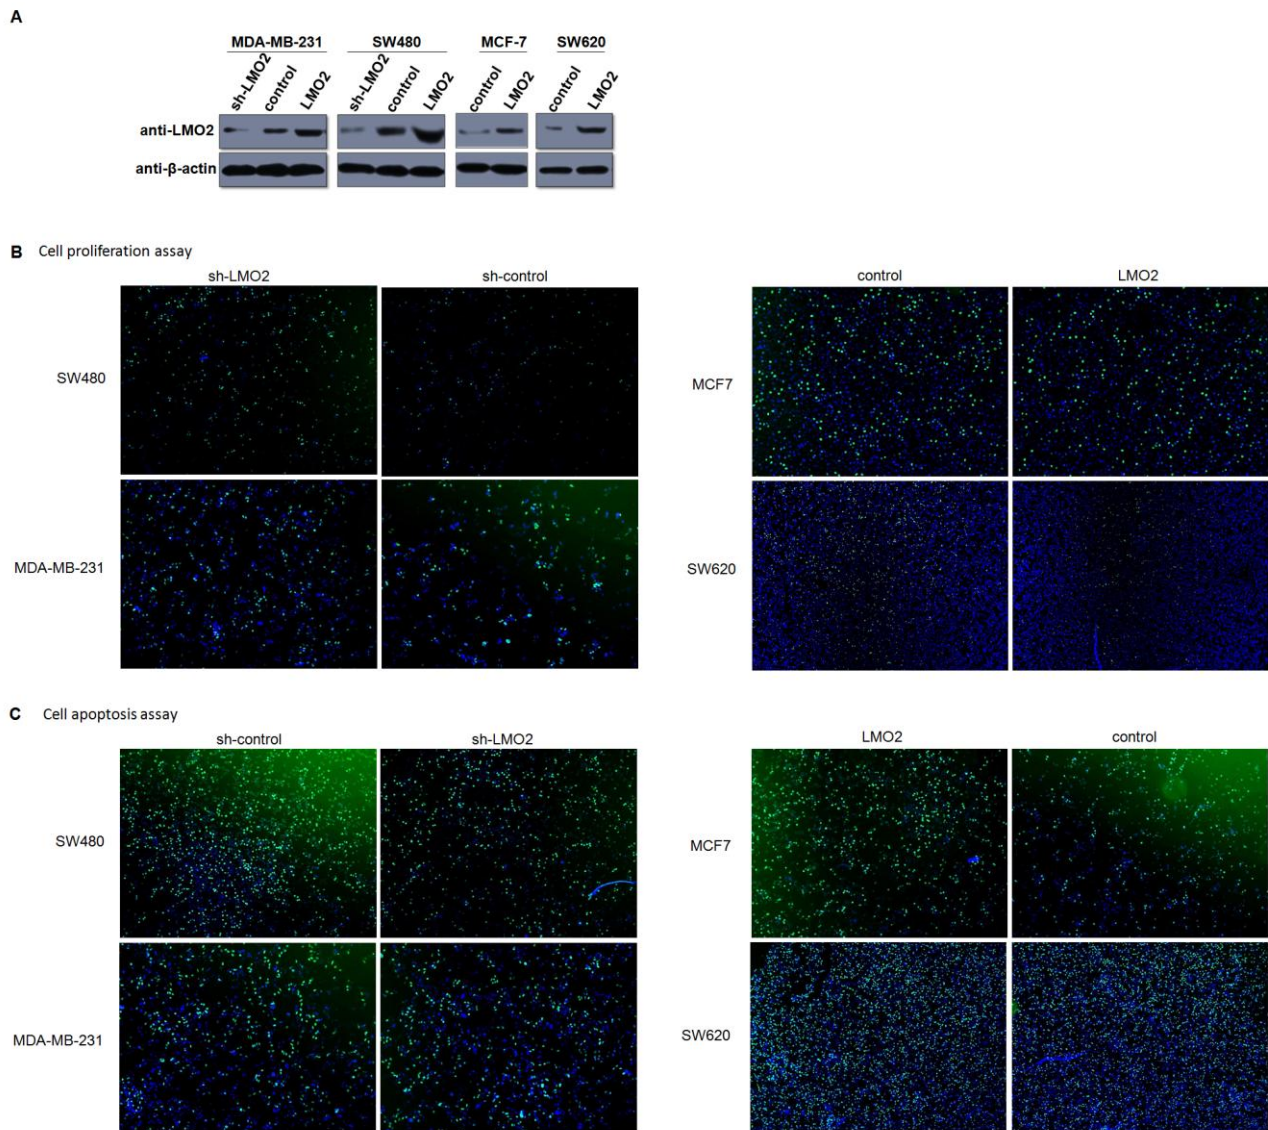

**Figure S2.** (A) Western blot images confirming LMO2 overexpression and knockdown efficiency in different cancer cell lines.  $\beta$ -actin was used as the loading control. (B) Representative images of Cell-Light™ EdU DNA cell proliferation in the indicated cells. (C) Representative Cell-Light™ EdUTP Apollo®488 TUNEL cell detection assay results. EdU-positive cells were stained with Fluor-488 fluorescence and nuclei were stained with Hoechst 33342. All images were obtained using the Cytation™ 3 system.



**A**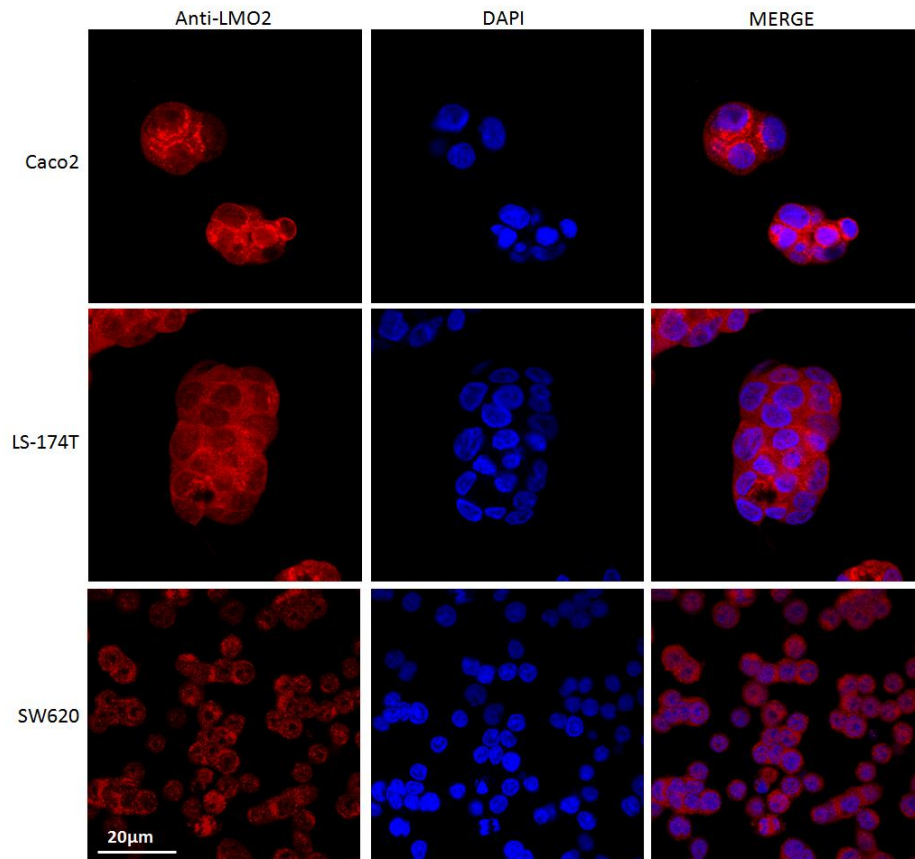**B**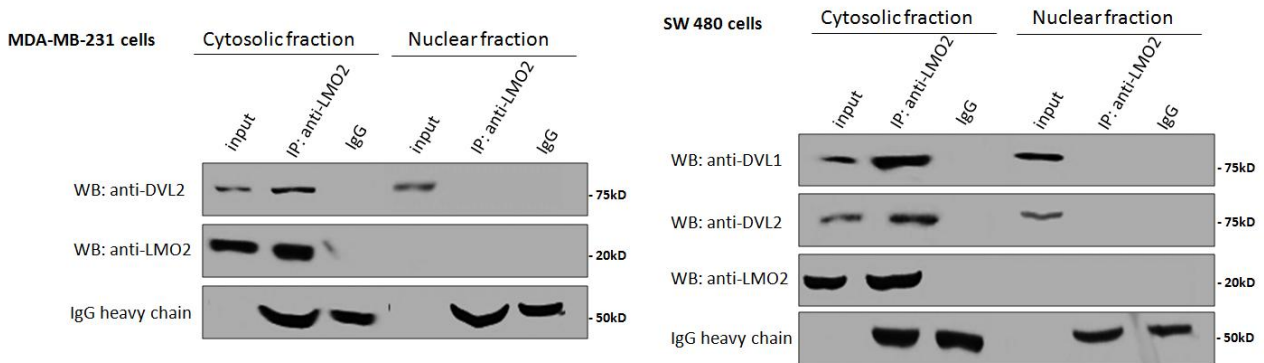

**Figure S3. LMO2 interacts with Dishevelled-1/2 primarily in the cytoplasm in breast and colorectal cancer cells.** (A) Representative immunofluorescence staining images of LMO2 in Caco-2, LS-174T, and SW620 colorectal cancer cell lines. LMO2 was stained with a mouse anti-LMO2 antibody followed by Alexa fluor-568 secondary fluorescent antibody; the nuclei were stained with DAPI. (B) Co-immunoprecipitation assay to confirm the interaction between DVL-1 or -2 and LMO2 in cytosolic fraction of MDA-MB-231 or

SW480 cells. One milligram of cytosolic protein or 500  $\mu$ g nuclear protein were used for the co-immunoprecipitation assay, and 1/20 of the cytosolic or nuclear protein from each sample was loaded as the input.

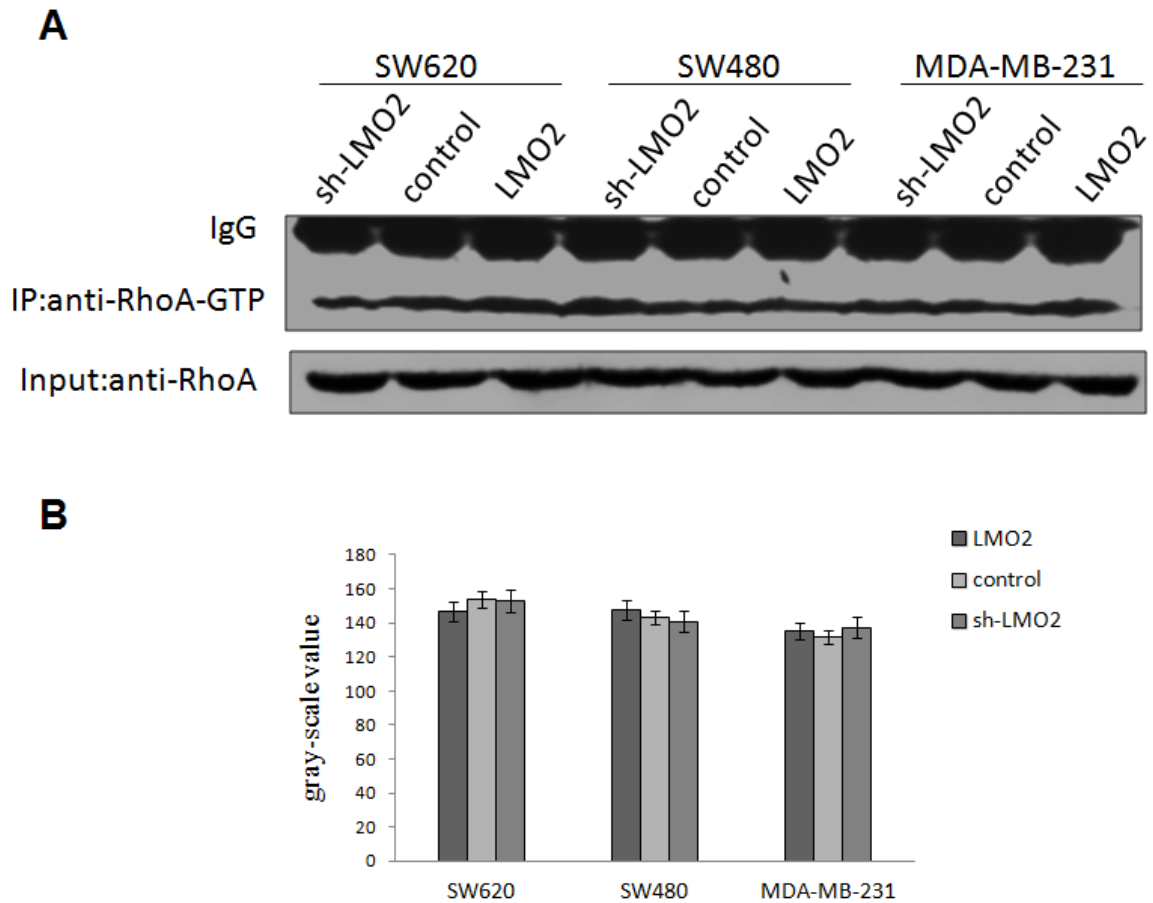

**Figure S4. RhoA activity after stimulation with Wnt3A in breast cancer and colorectal cancer cell lines.** (A) Western blotting of total and active RhoA in the indicated cells. (B) Quantification of the active RhoA immunoblotting bands. The images were scanned and quantified using ImageJ software. The bars represent the means of three independent experiments and the error bars indicate the standard error.



Original western blot of Figure 3A

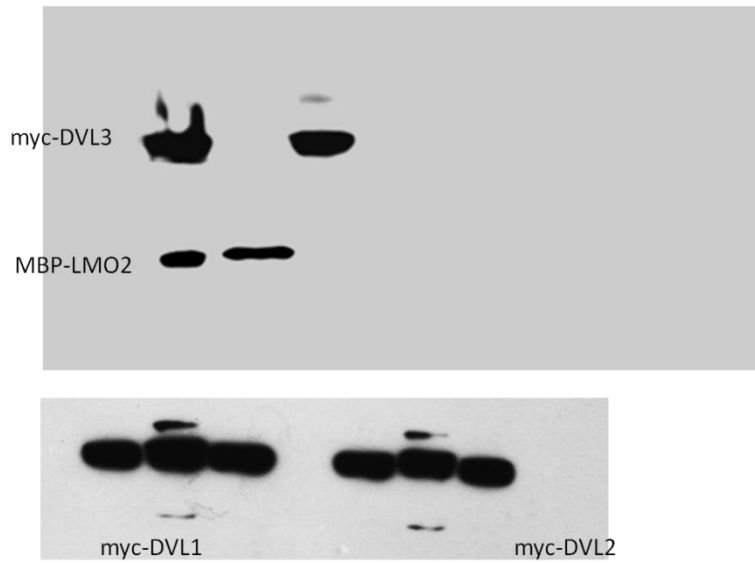

Original western blot of Figure 3B

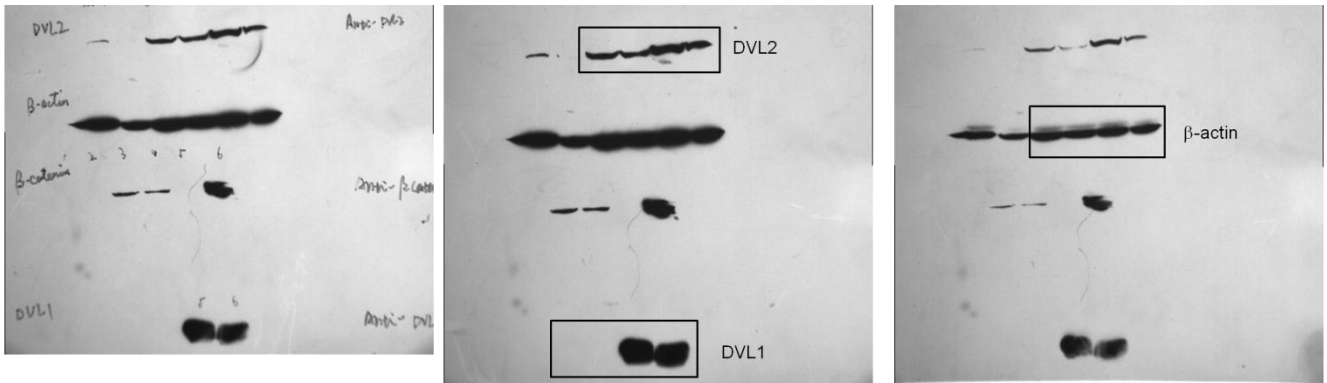

Original western blot of Figure 3C

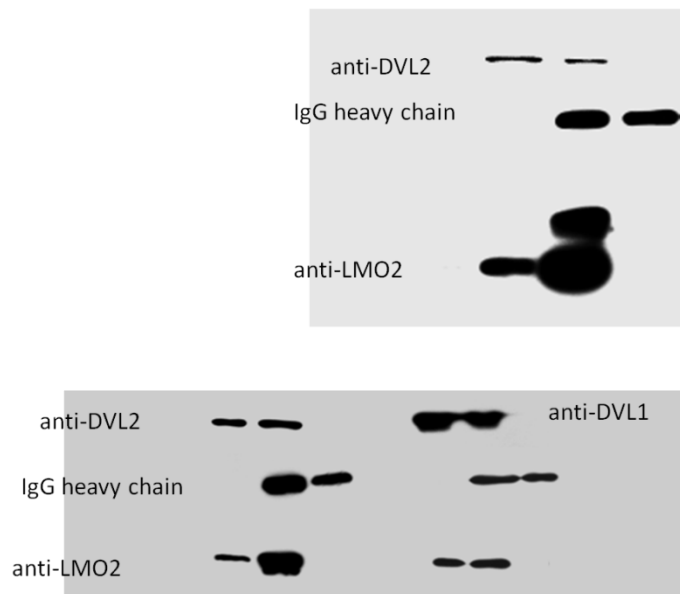

Original western blot of Figure 3E

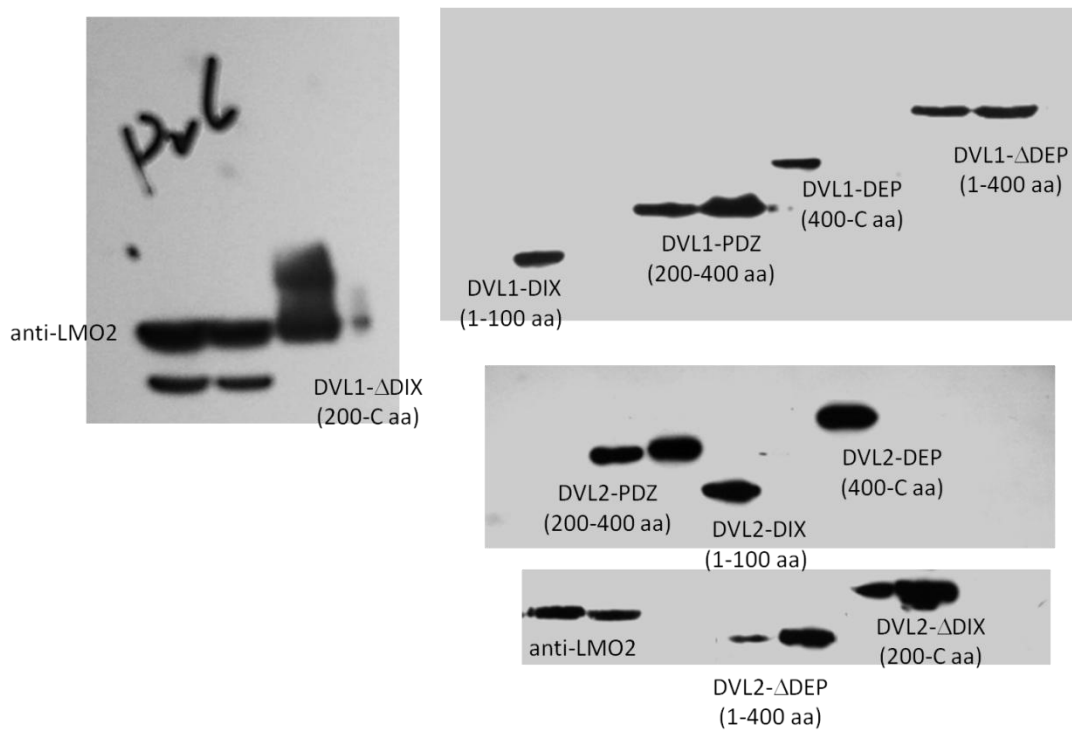

Supplement: srep36050-s2.pdf [file srep36050-s2.pdf]
